# Supplementary material
Source: publisher figshare collection journal article supplement (https://tandf.figshare.com/articles/dataset/_/3848445)
Supplement: Supplementary file 1 [file 1]

**Supplementary Table 1.** List of taxa used in the present study, including information about its origin, voucher (herbarium) information and GenBank accession numbers.

The list includes the three species for which new sequences were amplified (*F. cafferaria*, *F. longistipula* and *F. sergiae*), and the outgroup species used for the analysis.

Herbarium acronyms follow Holmgren et al. (1990). **Reference:** Holmgren, P. K., Holmgren, N. H., & Barnett, L. C. (1990). *Index Herbariorum. Part I: The Herbaria of the World* (8th ed.). New York, NY: New York Botanical Garden.

| Taxon                                                                            | Origin                | Voucher (Herbarium)                             | GenBank Acc. Nos. |                  |          |             |
|----------------------------------------------------------------------------------|-----------------------|-------------------------------------------------|-------------------|------------------|----------|-------------|
|                                                                                  |                       |                                                 | <i>rbcL</i>       | <i>trnL-trnF</i> | nrITS-2  | <i>psbA</i> |
| <i>Frullania aculeata</i> Taylor                                                 | Ecuador               | Gradstein, 10178 (GOET)                         | FJ380864          | FJ380388         | FJ380537 | FJ380698    |
| <i>Frullania acutiloba</i> Mitt.                                                 | India                 | Schäfer-Verwimp & Verwimp, 28265 (GOET)         | FJ380733          | FJ380257         | FJ380421 | FJ380572    |
| <i>Frullania allanii</i> E.A. Hodgs.                                             | Australia             | Streimann, 27697 (JE)                           | FJ380732          | FJ380256         | FJ380420 | FJ380571    |
| <i>Frullania amplicrania</i> Steph.                                              | Japan                 | Ohnishi, 5840 (HIRO)                            | FJ380760          | FJ380285         | FJ380447 | FJ380599    |
| <i>Frullania ampullifera</i> J.B. Jack & Steph.                                  | Fiji Islands          | Pócs & Pócs, 03308/A (GOET)                     | FJ380722          | FJ380246         | FJ380411 | FJ380561    |
| <i>Frullania anderssonii</i> Ångstr.                                             | La Réunion            | Szabo, 9415/G (GOET)                            | FJ380719          | FJ380243         | FJ380408 | FJ380558    |
| <i>Frullania angulata</i> Mitt.                                                  | Kenya                 | Pócs & Pócs, 04026/F (GOET)                     | FJ380869          | FJ380393         | FJ380542 | FJ380703    |
| <i>Frullania anomala</i> E.A. Hodgs.                                             | New Zealand           | Engel & von Konrat, 27319 (GOET)                | FJ380772          | FJ380297         | FJ380457 | FJ380611    |
| <i>Frullania apicalis</i> Mitt.                                                  | La Réunion            | Pócs, 9418/F (GOET)                             | FJ380861          | FJ380385         | FJ380534 | FJ380695    |
| <i>Frullania apiculata</i> (Reinw. et al.) Nees                                  | Fiji Islands          | Pócs & Pócs, 03309/AJ (GOET)                    | FJ380847          | FJ380371         | FJ380523 | FJ380681    |
| <i>Frullania appalachiana</i> R. M. Schust.                                      | USA                   | Davison 7888 (UNA)                              | --                | HQ330418         | HQ330382 | --          |
| <i>Frullania arecae</i> (Spreng.) Gottsche                                       | Ecuador               | Sauer & Gradstein, MS-E 030 (GOET)              | FJ380789          | FJ380313         | FJ380473 | FJ380626    |
| <i>Frullania armitiana</i> Steph.                                                | Papua New Guinea      | De Sloover, 42.754 (GOET)                       | FJ380842          | FJ380366         | --       | FJ380676    |
| <i>Frullania asagrayana</i> (Mont.) S. Hatt.                                     | USA                   | Davison, 6912 (UNA)                             | FJ380822          | FJ380344         | FJ380498 | FJ380657    |
| <i>Frullania aterrima</i> (Hook.f. & Taylor) Hook.f. & Taylor ex Gottsche et al. | New Zealand           | Engel & von Konrat, 26974 (GOET)                | FJ380846          | FJ380370         | FJ380522 | FJ380680    |
| <i>Frullania atrata</i> (Sw.) Nees                                               | Brazil                | Costa & Gradstein, 3859 (GOET)                  | FJ380853          | FJ380377         | FJ380527 | FJ380687    |
| <i>Frullania azorica</i> Sim-Sim, Sérgio, Mues & Kraut                           | Madeira               | Schäfer-Verwimp & Verwimp, 25896 (GOET)         | FJ380747          | FJ380272         | FJ380436 | FJ380586    |
| <i>Frullania baladina</i> Gottsche ex Steph.                                     | Fiji Islands          | Pócs & Pócs, 03259/N (GOET)                     | FJ380768          | FJ380293         | FJ380454 | FJ380607    |
| <i>Frullania berthoumieuui</i> Steph.                                            | Thailand              | Schäfer-Verwimp & Verwimp, 16155 (GOET)         | FJ380724          | FJ380248         | FJ380413 | FJ380563    |
| <i>Frullania bolanderi</i> Austin                                                | Russia                | Bakalin, Hepaticae Rossicae Exsiccatae 5 (GOET) | FJ380837          | FJ380361         | FJ380514 | FJ380671    |
| <i>Frullania brasiliensis</i> Raddi                                              | Bolivia               | Lozano & Mogro, 175 (GOET)                      | FJ380865          | FJ380389         | FJ380538 | FJ380699    |
| <i>Frullania brittoniae</i> A. Evans                                             | USA                   | Davison & Kauffman, 5334 (GOET)                 | FJ380753          | FJ380278         | FJ380442 | FJ380592    |
| <i>Frullania cafferaria</i> Steph.                                               | São Tomé and Príncipe | Garcia, 257412 (LISU)                           | KU310978          | KU310984         | KU310981 | --          |
| <i>Frullania calcarifera</i> Steph.                                              | Greece                | Düll 1a (JE)                                    | --                | HM167682         | HM167534 | --          |
| <i>Frullania californica</i> (Underw.) A. Evans                                  | USA                   | Shevock, 29932 (GOET)                           | FJ380823          | FJ380345         | FJ380499 | FJ380658    |
| <i>Frullania chevalieri</i> (R.M. Schust.) R.M. Schust.                          | New Zealand           | Engel & von Konrat, 27732a (GOET)               | FJ380778          | --               | --       | FJ380616    |

|                                                                                                   |                  |                                         |          |          |          |          |
|---------------------------------------------------------------------------------------------------|------------------|-----------------------------------------|----------|----------|----------|----------|
| <i>Frullania congesta</i> (Hook.f. & Taylor) Hook.f. & Taylor ex Gottsche et al.                  | New Zealand      | von Konrat, 98/429 (GOET)               | FJ380808 | FJ380331 | FJ380485 | FJ380645 |
| <i>Frullania cuencensis</i> Taylor                                                                | Argentina        | Drehwald, S 221 (GOET)                  | FJ380799 | FJ380322 | FJ380480 | FJ380636 |
| <i>Frullania davurica</i> Hampe                                                                   | Russia           | Gambaryan, VLA-h-764 (GOET)             | FJ380755 | FJ380280 | FJ380444 | FJ380594 |
| <i>Frullania deplanata</i> Mitt.                                                                  | New Zealand      | Schäfer-Verwimp & Verwimp, 13813 (GOET) | FJ380729 | FJ380253 | FJ380417 | FJ380568 |
| <i>Frullania depressa</i> Mitt.                                                                   | Kenya            | Pócs et al., 9217/D (GOET)              | FJ380797 | FJ380321 | FJ380479 | FJ380634 |
| <i>Frullania dilatata</i> (L.) Dumort.                                                            | Bulgaria         | Hentschel, Bryo 0758 (GOET)             | AM384881 | FJ380270 | FJ380434 | AM396285 |
| <i>Frullania diptera</i> (Lehm.) Drége                                                            | Kenya            | Pócs & Pócs, 04026/G (GOET)             | FJ380731 | FJ380255 | FJ380419 | FJ380570 |
| <i>Frullania duthiana</i> Steph.                                                                  | Bhutan           | Miehe & Miehe, 00-132-21 (GOET)         | FJ380754 | FJ380279 | FJ380443 | FJ380593 |
| <i>Frullania eboracensis</i> Gottsche                                                             | USA              | Davison, 5193 (GOET)                    | FJ380748 | FJ380273 | FJ380437 | FJ380587 |
| <i>Frullania echinantha</i> S. Hatt.                                                              | Papua New Guinea | De Sloover, 42.904 (GOET)               | FJ380725 | FJ380249 | FJ380414 | FJ380564 |
| <i>Frullania ecklonii</i> (Spreng.) Spreng.                                                       | Ecuador          | Nöske, 1705 (GOET)                      | FJ380785 | FJ380309 | FJ380469 | FJ380623 |
| <i>Frullania ericoides</i> (Nees) Mont.                                                           | Australia        | Streimann, 48697 (JE)                   | FJ380714 | FJ380238 | FJ380403 | FJ380553 |
| <i>Frullania eymae</i> S. Hatt.                                                                   | Sulawesi         | Abrahamczyk, Bryo 02985 (GOET)          | FJ380723 | FJ380247 | FJ380412 | FJ380562 |
| <i>Frullania falciloba</i> Taylor ex Lehm.                                                        | New Zealand      | Frahm, s.n. (GOET)                      | FJ380705 | FJ380229 | FJ380395 | FJ380544 |
| <i>Frullania fengyangshanensis</i> R.L. Zhu & M.L. So                                             | China            | Zhu, 961118 (JE)                        | FJ380757 | FJ380282 | --       | FJ380596 |
| <i>Frullania ferdinandi-muelleri</i> Steph.                                                       | Australia        | Pócs & Streimann, 99128/B (GOET)        | FJ380737 | FJ380261 | FJ380425 | FJ380576 |
| <i>Frullania fragilifolia</i> (Taylor) Gottsche et al.                                            | Germany          | Düll, s.n. (JE)                         | FJ380833 | FJ380357 | FJ380511 | FJ380667 |
| <i>Frullania franciscana</i> M. Howe                                                              | USA              | Tucker, 34867 (GOET)                    | FJ380829 | FJ380352 | FJ380506 | --       |
| <i>Frullania fugax</i> (Hook.f. & Taylor) Hook.f. & Taylor ex Gottsche et al.                     | New Zealand      | Engel & von Konrat, 24698 (GOET)        | FJ380770 | FJ380295 | FJ380455 | FJ380609 |
| <i>Frullania cf. fulfordiae</i> S. Hatt.                                                          | Australia        | Pócs & Pócs, 01048/N (GOET)             | FJ380767 | FJ380292 | FJ380453 | FJ380606 |
| <i>Frullania fuscovirens</i> var. <i>gemmipara</i> (R.M. Schust. & S. Hatt.) S. Hatt. & P.J. Lin. | China            | Koponen, 45098 (JE)                     | FJ380751 | FJ380276 | FJ380440 | FJ380590 |
| <i>Frullania gaudichaudii</i> (Nees & Mont.) Nees & Mont.                                         | Fiji Island      | Pócs & Pócs, 03282/W (GOET)             | FJ380831 | FJ380355 | FJ380509 | FJ380665 |
| <i>Frullania gibbosa</i> Nees                                                                     | Bolivia          | Gradstein, 7271 (GOET)                  | FJ380801 | FJ380324 | FJ380482 | FJ380638 |
| <i>Frullania glomerata</i> (Lehm. & Lindenb.) Nees & Mont.                                        | Brazil           | Costa & Gradstein, 3839 (GOET)          | FJ380774 | FJ380299 | FJ380459 | FJ380613 |
| <i>Frullania gracilis</i> (Reinw. et al.) Gottsche et al.                                         | Thailand         | Schäfer-Verwimp & Verwimp, 16158 (GOET) | FJ380840 | FJ380364 | FJ380517 | FJ380674 |
| <i>Frullania grossiclava</i> Steph.                                                               | Madagascar       | Geissler, 19675 (GOET)                  | FJ380821 | FJ380343 | FJ380497 | FJ380656 |
| <i>Frullania hamata</i> Steph.                                                                    | Papua New Guinea | Bellamy, 1615 (JE)                      | FJ380815 | FJ380337 | FJ380492 | FJ380651 |
| <i>Frullania hattorii</i> Konrat & Braggins                                                       | New Zealand      | Frahm, 22-1 (GOET)                      | FJ380844 | FJ380368 | FJ380520 | FJ380678 |
| <i>Frullania holostipula</i> S. Hatt. & D.G. Griffin                                              | Venezuela        | Pócs & Rico, 9736/CA (GOET)             | FJ380790 | FJ380314 | FJ380474 | FJ380627 |
| <i>Frullania howeana</i> Steph.                                                                   | Lord Howe Island | Brown & Leishman, 2000/38 (GOET)        | FJ380720 | FJ380244 | FJ380409 | FJ380559 |
| <i>Frullania hypoleuca</i> Nees                                                                   | Java             | Lee & Indri, 100 (GOET)                 | FJ380802 | FJ380325 | FJ380483 | FJ380639 |
| <i>Frullania incumbens</i> Mitt.                                                                  | New Zealand      | De Lange, CH349 (GOET)                  | FJ380771 | FJ380296 | FJ380456 | FJ380610 |
| <i>Frullania inflata</i> Gottsche                                                                 | Russia           | Gambaryan, VLA-h-826 (GOET)             | FJ380835 | FJ380359 | FJ380513 | FJ380669 |
| <i>Frullania intermedia</i> (Reinw. et al.) Gottsche et al.                                       | Fiji Islands     | Pócs & Pócs, 03281/L (GOET)             | FJ380817 | FJ380339 | FJ380494 | FJ380653 |
| <i>Frullania intumescens</i> (Lehm. & Lindenb.) Lehm. & Lindenb.                                  | Ecuador          | Nöske, 310 (GOET)                       | FJ380856 | FJ380380 | FJ380529 | FJ380690 |
| <i>Frullania jackii</i> Gottsche                                                                  | Switzerland      | Urmi & Schäfer-Verwimp, 16328 (GOET)    | FJ380756 | FJ380281 | FJ380445 | FJ380595 |
| <i>Frullania kunzei</i> (Lehm. & Lindenb.) Lehm. Lindenb.                                         | Brazil           | Costa & Gradstein, 3769 (GOET)          | FJ380863 | FJ380387 | FJ380536 | FJ380697 |
| <i>Frullania lindenbergii</i> Lehm.                                                               | La Réunion       | Pócs, 9422/D (GOET)                     | FJ380803 | FJ380326 | --       | FJ380640 |
| <i>Frullania lobulata</i> (Hook.) Hook. & Nees                                                    | Chile            | Buck, 39518 (GOET)                      | FJ380781 | FJ380305 | FJ380465 | FJ380619 |

|                                                                                  |                       |                                         |          |          |          |          |
|----------------------------------------------------------------------------------|-----------------------|-----------------------------------------|----------|----------|----------|----------|
| <i>Frullania longistipula</i> Steph.                                             | São Tomé and Príncipe | Garcia, 257411 (LISU)                   | KU310979 | KU310985 | KU310982 | --       |
| <i>Frullania magellanica</i> F. Weber & Nees                                     | Chile                 | Engel, 25265 (GOET)                     | FJ380780 | FJ380304 | FJ380464 | FJ380618 |
| <i>Frullania meyeniana</i> Lindenb.                                              | Fiji Islands          | Pócs & Pócs, 03289/B (GOET)             | FJ380859 | FJ380383 | FJ380532 | FJ380693 |
| <i>Frullania microcaulis</i> Gola                                                | Chile                 | Engel, 25351 (GOET)                     | FJ380782 | FJ380306 | FJ380466 | FJ380620 |
| <i>Frullania microphylla</i> (Gottsche) Pearson                                  | Tenerife              | Eckstein, 2287 (GOET)                   | FJ380834 | FJ380358 | FJ380512 | FJ380668 |
| <i>Frullania mirabilis</i> J.B. Jack & Steph.                                    | Ecuador               | Gradstein & Mandl, 10129 (GOET)         | FJ380851 | FJ380375 | FJ380526 | FJ380685 |
| <i>Frullania moniliata</i> (Reinw. et al.) Kamim.                                | India                 | Schäfer-Verwimp & Verwimp, 28061 (GOET) | FJ380828 | FJ380351 | FJ380505 | FJ380663 |
| <i>Frullania monocera</i> (Hook.f. & Taylor) Hook.f. & Taylor ex Gottsche et al. | New Zealand           | von Konrat, 98/19 (GOET)                | FJ380735 | FJ380259 | FJ380423 | FJ380574 |
| <i>Frullania moritziana</i> Lindenb. & Gottsche                                  | Venezuela             | Griffin & López F., PV-766 (GOET)       | FJ380857 | FJ380381 | FJ380530 | FJ380691 |
| <i>Frullania multilacera</i> Steph.                                              | Papua New Guinea      | Koponen, 28259 (JE)                     | FJ380839 | FJ380363 | FJ380516 | FJ380673 |
| <i>Frullania nepalensis</i> (Spreng.) Lehm. & Lindenb.                           | Bhutan                | Miehe & Miehe, 99-212-37 (GOET)         | FJ380742 | FJ380266 | FJ380430 | FJ380581 |
| <i>Frullania aff. neurota</i> Taylor                                             | Brazil                | Costa & Gradstein, 3712 (GOET)          | FJ380800 | FJ380323 | FJ380481 | FJ380637 |
| <i>Frullania nicholsonii</i> E.A. Hodgs.                                         | New Zealand           | von Konrat, 97/02a (GOET)               | FJ380709 | FJ380233 | FJ380399 | FJ380548 |
| <i>Frullania nisquallensis</i> (Sull.) S. Hatt.                                  | USA                   | Doyle, 11001 (GOET)                     | FJ380826 | FJ380349 | FJ380503 | FJ380661 |
| <i>Frullania nodulosa</i> (Reinw. et al.) Nees                                   | Fiji Islands          | Pócs & Pócs, 03261/A (GOET)             | FJ380813 | FJ380335 | FJ380490 | FJ380649 |
| <i>Frullania novoguineensis</i> Schiffn.                                         | Papua New Guinea      | Bellamy, 1366 (JE)                      | FJ380818 | FJ380340 | --       | --       |
| <i>Frullania obcordata</i> (Lehm. & Lindenb.) Lehm. & Lindenb.                   | Brazil                | Costa & Gradstein, 3713 (GOET)          | FJ380804 | FJ380327 | --       | FJ380641 |
| <i>Frullania obscurifolia</i> Mitt.                                              | Kenya                 | Pócs & Pócs, 04004/G (GOET)             | FJ380765 | FJ380290 | FJ380451 | FJ380604 |
| <i>Frullania onraedtii</i> Vanden Berghen                                        | La Réunion            | Vojtko, 9427/AT (GOET)                  | FJ380860 | FJ380384 | FJ380533 | FJ380694 |
| <i>Frullania orientalis</i> Sande Lac.                                           | Papua New Guinea      | Norris, 60974 (JE)                      | FJ380738 | FJ380262 | FJ380426 | FJ380577 |
| <i>Frullania parhamii</i> R.M. Schust.                                           | Fiji Islands          | von Konrat, 6/14-27 (GOET)              | FJ380779 | FJ380303 | FJ380463 | FJ380617 |
| <i>Frullania parvistipula</i> (Steph.) R.M. Schust.                              | Sicily                | Eckstein, 4684 (GOET)                   | FJ380749 | FJ380274 | FJ380438 | FJ380588 |
| <i>Frullania patula</i> Mitt.                                                    | New Zealand           | von Konrat, 98/43 (GOET)                | FJ380728 | FJ380252 | FJ380416 | FJ380567 |
| <i>Frullania peruviana</i> Gottsche                                              | Ecuador               | Schäfer-Verwimp et al., 24356 (GOET)    | FJ380870 | FJ380394 | FJ380543 | FJ380704 |
| <i>Frullania pittieri</i> Steph.                                                 | Panama                | Salazar Allen et al., 9437 (GOET)       | FJ380858 | FJ380382 | FJ380531 | FJ380692 |
| <i>Frullania plana</i> Sull.                                                     | USA                   | Davison, 4325 (GOET)                    | FJ380743 | FJ380267 | FJ380431 | FJ380582 |
| <i>Frullania pluricarinata</i> Gottsche                                          | USA                   | Worthington, 32194 (GOET)               | FJ380795 | FJ380319 | FJ380477 | FJ380632 |
| <i>Frullania polysticta</i> Lindenb.                                             | Tenerife              | Eckstein, 2283 (GOET)                   | FJ380825 | FJ380347 | FJ380501 | FJ380660 |
| <i>Frullania pychantha</i> Mont.                                                 | New Zealand           | Engel & von Konrat, 24353 (GOET)        | FJ380807 | FJ380330 | FJ380484 | FJ380644 |
| <i>Frullania purpurea</i> Steph.                                                 | Seychelles            | Pócs, 9320/O (GOET)                     | FJ380838 | FJ380362 | FJ380515 | FJ380672 |
| <i>Frullania pycnantha</i> (Hook.f. & Taylor) Taylor ex Gottsche et al.          | New Zealand           | von Konrat, 98/276 (GOET)               | FJ380717 | FJ380241 | FJ380406 | FJ380556 |
| <i>Frullania reflexistipula</i> Sande Lac.                                       | Java                  | Lee & Indri, 97 (GOET)                  | FJ380734 | FJ380258 | FJ380422 | FJ380573 |
| <i>Frullania regularis</i> Schiffn.                                              | Papua New Guinea      | Streimann, 40657/a (JE)                 | FJ380819 | FJ380341 | FJ380495 | FJ380654 |
| <i>Frullania repandistipula</i> Sande Lac.                                       | La Réunion            | Vojtko, 9435/KC (GOET)                  | FJ380809 | FJ380332 | FJ380486 | FJ380646 |
| <i>Frullania reptans</i> Mitt.                                                   | New Zealand           | Engel & von Konrat, 24974 (GOET)        | FJ380763 | FJ380288 | FJ380450 | FJ380602 |
| <i>Frullania ringens</i> Spruce                                                  | Peru                  | Schäfer-Verwimp & Verwimp, 11862 (GOET) | FJ380786 | FJ380310 | FJ380470 | --       |
| <i>Frullania riojaneirensis</i> (Raddi) Ångstr.                                  | Peninsular Malaysia   | Schäfer-Verwimp & Verwimp, 18680 (GOET) | FJ380791 | FJ380315 | FJ380475 | FJ380628 |
| <i>Frullania riparia</i> Hampe ex Lehm.                                          | USA                   | Worthington, 29965 (GOET)               | FJ380759 | FJ380284 | FJ380446 | FJ380598 |
| <i>Frullania rostrata</i> (Hook.f. & Taylor) Hook.f. & Taylor ex Gottsche et al. | New Zealand           | Engel & von Konrat, 27369 (GOET)        | FJ380776 | FJ380301 | FJ380461 | FJ380615 |

|                                                                                     |                      |                                            |          |          |          |          |
|-------------------------------------------------------------------------------------|----------------------|--------------------------------------------|----------|----------|----------|----------|
| <i>Frullania scandens</i> Mont.                                                     | New Zealand          | Braggins, 98/216/b (GOET)                  | FJ380730 | FJ380254 | FJ380418 | FJ380569 |
| <i>Frullania sergiae</i> Sim-Sim et al.                                             | Portugal,<br>Madeira | Sim-Sim, 257410 (LISU)                     | KU310980 | KU310986 | KU310983 | --       |
| <i>Frullania serrata</i> Gottsche                                                   | Sumatra              | Schäfer-Verwimp & Verwimp,<br>25034 (GOET) | FJ380849 | FJ380373 | FJ380524 | FJ380683 |
| <i>Frullania sheana</i> S. Hatt.                                                    | Australia            | Meagher, 1081 (GOET)                       | FJ380841 | FJ380365 | FJ380518 | FJ380675 |
| <i>Frullania solanderiana</i> Colenso                                               | New Zealand          | von Konrat, 99/431 (GOET)                  | FJ380775 | FJ380300 | FJ380460 | FJ380614 |
| <i>Frullania spathulistipa</i> Steph.                                               | Australia            | Streimann, 15344 (JE)                      | FJ380761 | FJ380286 | FJ380448 | FJ380600 |
| <i>Frullania sphaerocephala</i> Spruce                                              | Ecuador              | Gradstein, 10100 (GOET)                    | FJ380783 | FJ380307 | FJ380467 | FJ380621 |
| <i>Frullania spinifera</i> Taylor                                                   | New Zealand          | von Konrat & Engel, 27017 (GOET)           | FJ380721 | FJ380245 | FJ380410 | FJ380560 |
| <i>Frullania spinigastria</i> S. Hatt.                                              | Australia            | Pócs & Streimann, 99200/B (GOET)           | FJ380727 | FJ380251 | FJ380415 | FJ380566 |
| <i>Frullania squarrosula</i> (Hook.f. & Taylor) Hook.f. & Taylor ex Gottsche et al. | New Zealand          | von Konrat, 99/195 (GOET)                  | FJ380708 | FJ380232 | FJ380398 | FJ380547 |
| <i>Frullania subcaduca</i> S. Hatt.                                                 | Papua New Guinea     | Norris, 62427 (JE)                         | FJ380758 | FJ380283 | --       | FJ380597 |
| <i>Frullania subdentata</i> Steph.                                                  | Papua New Guinea     | Norris, 66625 (JE)                         | FJ380848 | FJ380372 | --       | FJ380682 |
| <i>Frullania subincumbens</i> S. Hatt.                                              | Lord Howe Island     | Brown, 2000/14 (GOET)                      | FJ380766 | FJ380291 | FJ380452 | FJ380605 |
| <i>Frullania subnigricaulis</i> var. <i>subtruncata</i> S. Hatt.                    | Papua New Guinea     | Koponen, 28955 (JE)                        | FJ380726 | FJ380250 | --       | FJ380565 |
| <i>Frullania subrostrata</i> S. Hatt.                                               | New Zealand          | Engel & von Konrat, 27770-B (GOET)         | FJ380843 | FJ380367 | FJ380519 | FJ380677 |
| <i>Frullania tamarisci</i> (L.) Dumort                                              | Germany              | Hentschel, Bryo 0733 (GOET)                | AM384880 | FJ380348 | FJ380502 | AM396284 |
| <i>Frullania taradakensis</i> Steph.                                                | Russia               | Gambaryan, VLA-h-858 (GOET)                | FJ380752 | FJ380277 | FJ380441 | FJ380591 |
| <i>Frullania teneriffae</i> (F. Weber) Nees                                         | Ireland              | Fischer & Fischer, Bryo 01330 (GOET)       | AM384879 | FJ380354 | FJ380508 | AM396283 |
| <i>Frullania tetraptera</i> Nees & Mont.                                            | Chile                | Dierßen, s.n. (GOET)                       | FJ380796 | FJ380320 | FJ380478 | FJ380633 |
| <i>Frullania trinervis</i> (Lehm.) Drège                                            | Uganda               | Pócs & Lye, 97151/E (GOET)                 | FJ380811 | FJ380333 | FJ380488 | FJ380647 |
| <i>Frullania usambarana</i> Schiffn. ex Steph.                                      | La Réunion           | Pócs, 9415/L (GOET)                        | F-380820 | FJ380342 | FJ380496 | FJ380655 |
| <i>Frullania usamiensis</i> Steph.                                                  | Japan                | Deguchi, 34977 (HIRO)                      | FJ380750 | FJ380275 | FJ380439 | FJ380589 |
| <i>Frullania virginica</i> Gottsche                                                 | USA                  | Hyatt s.n. (GOET)                          | --       | HQ330447 | HQ330416 | --       |
| <i>Frullania vitalii</i> Yuzawa & S. Hatt.                                          | Brazil               | Schäfer-Verwimp & Verwimp,<br>15063 (GOET) | FJ380850 | FJ380374 | FJ380525 | FJ380684 |
| <i>Frullania vittiana</i> S. Hatt.                                                  | Lord Howe Island     | Brown, 2000/18 (GOET)                      | FJ380707 | FJ380231 | FJ380397 | FJ380546 |
| <i>Bryopteris filicina</i> (Sw.) Nees                                               | Dominican Republic   | Buck, 14736 (GOET)                         | AY550110 | AY463549 | AM237117 | --       |
| <i>Ceratolejeunea coarina</i> Gottsche                                              | Brazil               | Zartman, 1235.1 (DUKE)                     | AY608026 | AY608122 | --       | AY607934 |
| <i>Cheilolejeunea rigidula</i> (Mont.) R.M.Schust.                                  | Suriname             | Munoz, 98-62 (GOET)                        | DQ983668 | DQ987453 | DQ987353 | EF011837 |
| <i>Jubula bogotensis</i> Steph.                                                     | Mexico               | Gradstein s.n. (GOET)                      | AY548100 | DQ987388 | DQ987273 | EF011758 |
| <i>Jubula hutchinsiae</i> (Hook.) Dumort.                                           | Portugal             | Drehwald, 3007 (GOET)                      | AY548101 | DQ987380 | DQ987260 | EF011746 |
| <i>Lejeunea cerina</i> (Lehm. & Lindeb.) Gottsche, Lindenb. & Nees                  | Ecuador              | Wilson et al. 04-13 (GOET)                 | DQ983689 | DQ987441 | DQ987339 | EF011820 |
| <i>Mastigolejeunea auriculata</i> (Wilson) Schiffn.                                 | Bolivia              | Churchill, 21275 (GOET)                    | AY548070 | DQ987385 | DQ987268 | AM396276 |
| <i>Myriocolea irrorata</i> Spruce                                                   | Ecuador              | Gradstein et al. 10033A (GOET)             | AY548072 | DQ238584 | DQ987279 | --       |
| <i>Nipponolejeunea subalpina</i> (Horik.) S. Hatt.                                  | Japan                | Ohnishi, 5611 (HIRO)                       | AM392292 | FJ380227 | DQ987289 | AM396290 |
| <i>Nipponolejeunea pilifera</i> (Steph.) S. Hatt.                                   | Japan                | Higuchi, 41359                             | AY776304 | AY776310 | AY776307 | --       |
| <i>Spruceanthus thozetianus</i> (Gottsche & F.A. Müll.) B. Thiers & Gradst.         | Australia            | Pocs 01107/M (GOET)                        | AM384877 | DQ987460 | DQ987362 | JN184455 |
