# Supplementary material
Source: publisher figshare collection journal article supplement (https://tandf.figshare.com/articles/dataset/_/3848445)
Supplement: Supplementary file 2 [file 1]

Archive with 2 entries (2 files):
- tsab_a_1217096_sm8828.pdf
- tsab_a_1217096_sm8827.pdf
