# Supplementary material
Source: publisher figshare collection journal article supplement (https://tandf.figshare.com/articles/dataset/_/3848445)

**Supplementary Figure 1.** Bayesian phylogenetic tree with relationships among *Frullania* species based on concatenated sequences of cpDNA *rbcL*, *psbA* and *trnL-trnF* and nrDNA ITS2, with full support information for all internal nodes - bayesian posterior probabilities (PP, left) and ML bootstrap values (BS, right). Reference to the morphological circumscription of *Frullania* subgenera (following current sub-generic morpholog classification) are next to each clade.

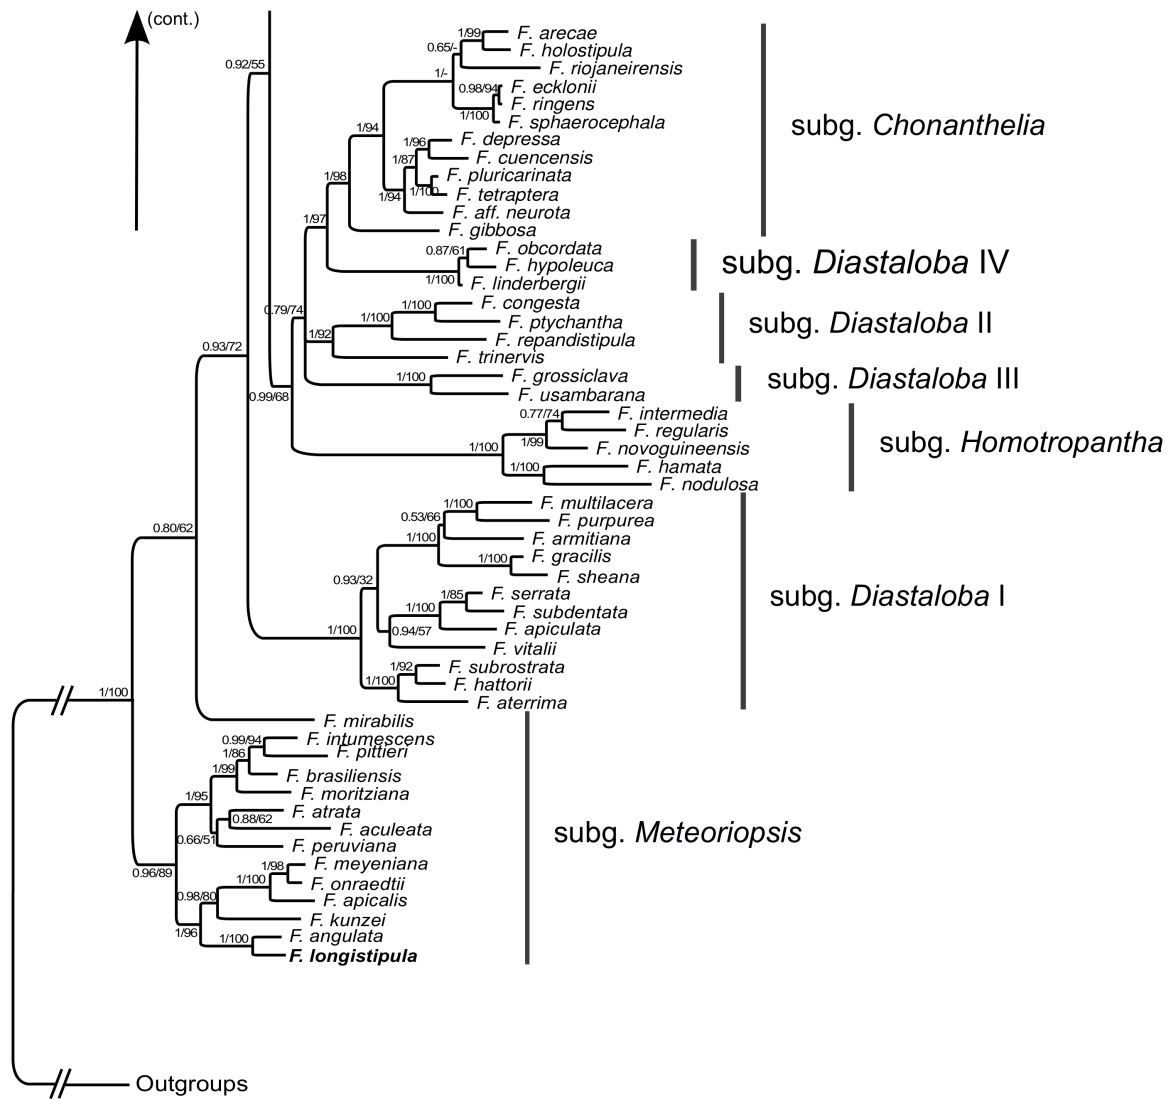

Supplement: Supplementary file 2 [file 1 › tsab_a_1217096_sm8827.pdf]
